# Supplementary material for: Trace tungsten and iron-doped nickel hydroxide nanosheets for an efficient oxygen evolution reaction
Source: Royal Society of Chemistry journal article supplement (doi:10.1039/d0se00205d), 2020-01-01
Supplement: d0se00205d1.pdf [file d0se00205d1.pdf]

# Electronic Supporting information for

## Trace tungsten and iron-doped nickel hydroxide nanosheets

### for an efficient oxygen evolution reaction

Chun Li, Peng Tian\*\*, Hongchang Pang, Weitao Gong, Junwei Ye, Guiling Ning\*

State Key Laboratory of Fine Chemicals, School of Chemical Engineering, Dalian University of Technology, Dalian, 116024, China

\*Corresponding author. E-mail address: ninggl@dlut.edu.cn .

\*\*Corresponding author. E-mail address: tianpeng@dlut.edu.cn

#### CAPTIONS

|                                                                                                 |     |
|-------------------------------------------------------------------------------------------------|-----|
| Calculation.....                                                                                | S1  |
| SEM images of samples.....                                                                      | S3  |
| EDX spectrum.....                                                                               | S4  |
| HR-TEM images and corresponding SAED patterns.....                                              | S5  |
| STEM images and the corresponding elemental mapping.....                                        | S5  |
| XPS fine structures spectrum and survey spectra.....                                            | S6  |
| XPS spectrum before and after OER.....                                                          | S10 |
| LSV error analysis curves.....                                                                  | S11 |
| LSV curves of other catalyst materials.....                                                     | S11 |
| LSV curves for different Fe,W atoms ratio.....                                                  | S12 |
| LSV curves of samples doping with/without B element.....                                        | S12 |
| Cyclic voltammograms of samples at different scan rates.....                                    | S13 |
| OER measures at different temperature.....                                                      | S14 |
| LSV curves of samples with different annealed temperature.....                                  | S15 |
| SEM images of Fe <sub>0.03</sub> -W <sub>0.03</sub> -Ni LDH <sup>B</sup> samples after OER..... | S16 |
| ICP data.....                                                                                   | S16 |
| Comparison of other relevant OER catalyst materials.....                                        | S17 |

## Calculation

Equation S(1) XRD Williamsone-Hall methods

We could get the information about lattice strain and crystalline size based on Williamson–Hall equation through the full width at half maximum (FWHM) of the XRD peak. The W-H equation is (1),

$$\frac{\beta_{hkl}\cos\theta}{\lambda} = \frac{k\lambda}{D} + 4\epsilon\sin\theta \quad (1)$$

where D is particle size in nanometer,  $\epsilon$  is the strain component without dimensionless, k is a constant equal to 0.94,  $\lambda$  is wavelength of radiation (1.54056 Å for Cu K $\alpha$  radiation),  $\beta_{hkl}$  is diffraction peak width at half-maximum intensity, and  $\theta$  is diffraction angle. By plotting  $\beta_{hkl}\cos\theta$  versus  $4\sin\theta$ , we provides more of the crystal structure details, such as the slope and y-intersect of the fitted line represent strain and particle size parameter, respectively.

Equation S(2) To measure electrochemical capacitance, the potential was swept between 0.28 and 0.38 V versus Hg/HgO at ten different scan rates (10, 20, 30, 40, 50, 60, 70, 80, 90 and 100), as shown in Figure S18. The measured capacitive currents are plotted as a function of scan rate and the linear slope is equivalent to twice of the  $C_{dl}$ . Ni(Fe)O $_x$ H $_y$  have been determined with an areal capacitance of  $\sim 80 \mu\text{F cm}^{-2}$  in the charged state. The specific capacitances for Carbon Clothes, Ni LDH, Fe $_{0.03}$ -Ni LDH, Fe $_{0.03}$ W $_{0.03}$ -Ni LDH and Fe $_{0.03}$ W $_{0.03}$ -Ni LDH<sup>B</sup> are determined as 1.8, 1.9, 1.5, 1.7 and 2.9 mF cm $^{-2}$ , respectively. ECSA is calculated as follows:

$$A_{ECSA} = \frac{C_{dl}^{sample}}{80\mu\text{F}^{NiO}} \quad (2)$$

Equation S(3) For temperature-dependent measurements, the kinetics of the OER are increased at elevated temperatures from 20°C to 60°C, reflecting the temperature dependence of the chemical rate constant, which is approximately proportional to  $\exp(-\Delta H^*/kT)$ . The Arrhenius equation is (3),

$$\frac{\partial(\log i_k)}{\partial(1/T)} = \frac{-\Delta H^*}{2.3R} \quad (\eta = 300mV)$$

where  $\Delta H^*$  is the apparent enthalpy of activation (here after simply termed as the activation energy),  $i_k$  is the kinetic current at  $\eta = 300$  mV, T is the temperature, and R is the universal gas constant.

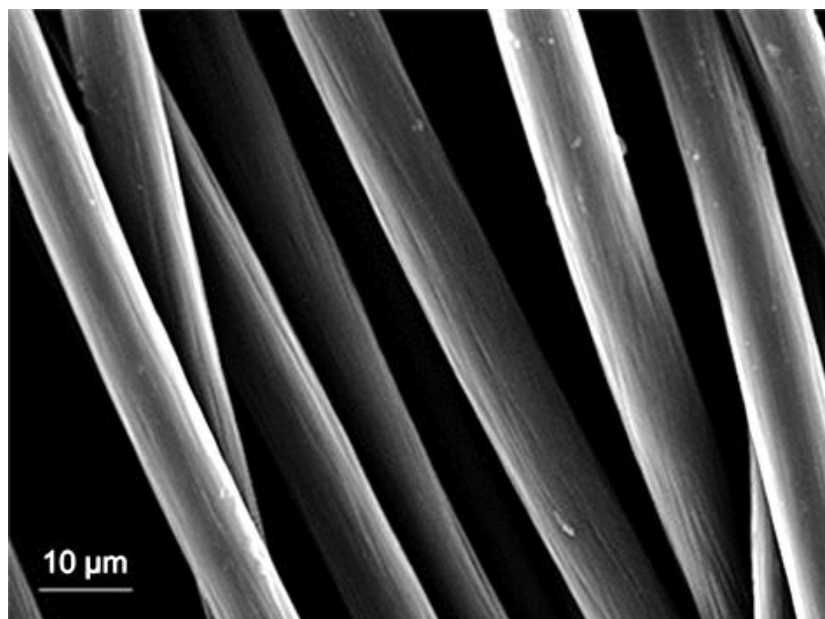

Fig. S1 SEM image of carbon fiber clothes

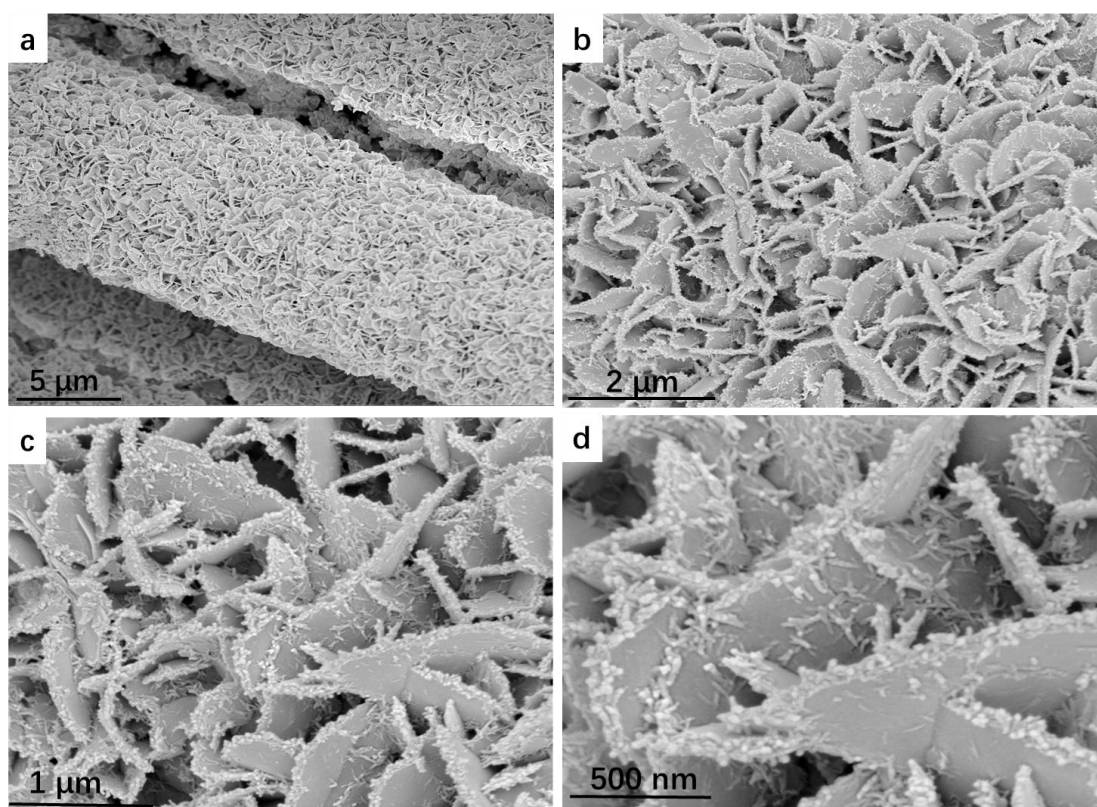

Fig. S2 SEM images of Fe<sub>0.03</sub>W<sub>0.03</sub>-Ni LDH samples

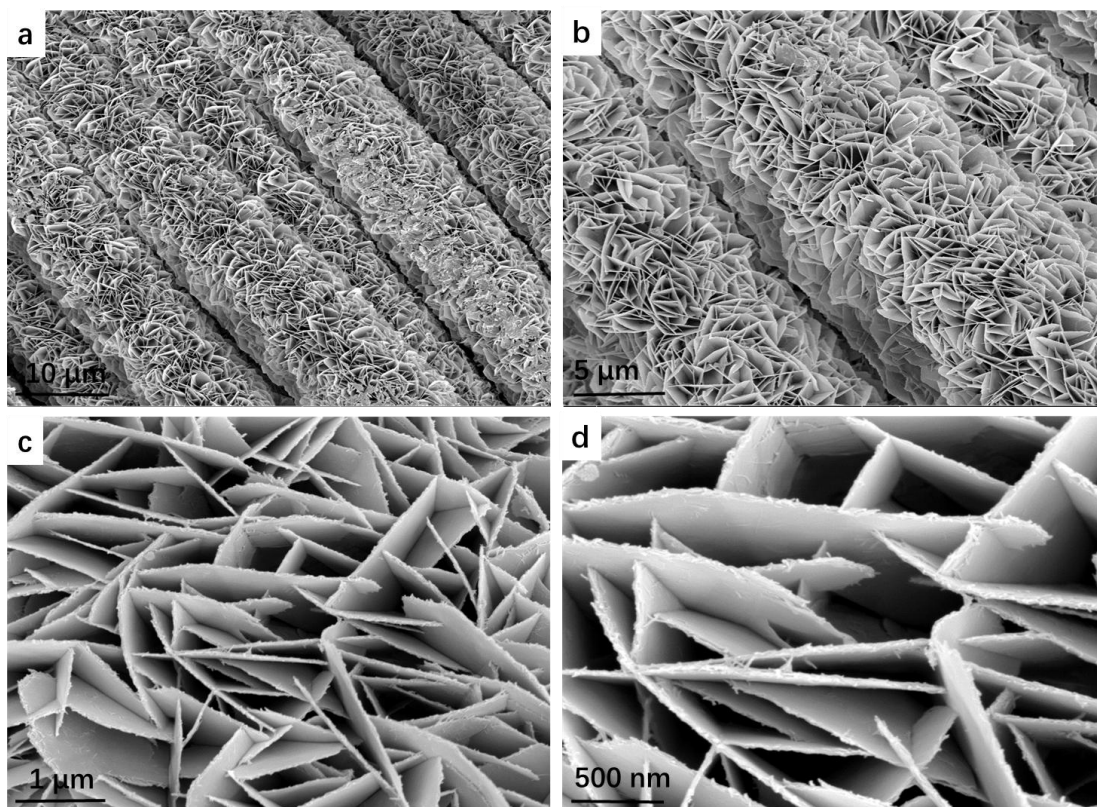

Fig. S3 SEM images of  $\text{Fe}_{0.03}\text{-Ni}$  LDH samples.

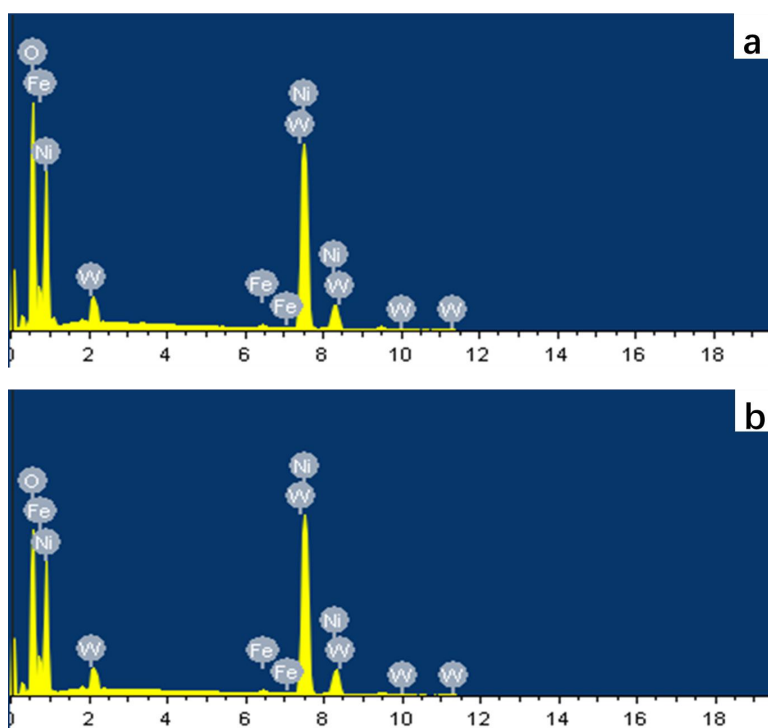

Fig. S4 EDX spectrum. a)  $\text{Fe}_{0.03}\text{W}_{0.03}\text{-Ni}$  LDH<sup>B</sup> b) Post-OER  $\text{Fe}_{0.03}\text{W}_{0.03}\text{-Ni}$  LDH<sup>B</sup>

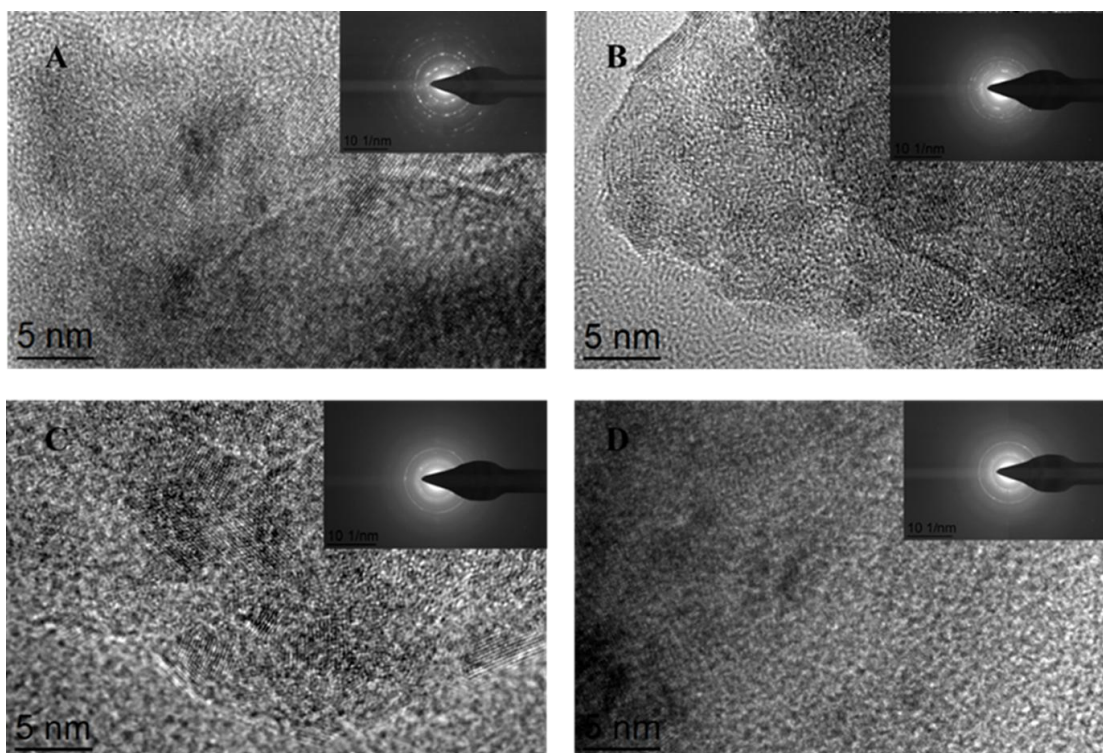

Fig. S5 (a-d) HR-TEM images of  $\text{Fe}_{0.03}\text{Ni}$  LDH,  $\text{Fe}_{0.03}\text{W}_{0.03}\text{-Ni}$  LDH,  $\text{Fe}_{0.03}\text{W}_{0.03}\text{-Ni}$  LDH<sup>B</sup>, post-OER  $\text{Fe}_{0.03}\text{W}_{0.03}\text{-Ni}$  LDH<sup>B</sup> and corresponding SAED patterns (insert).

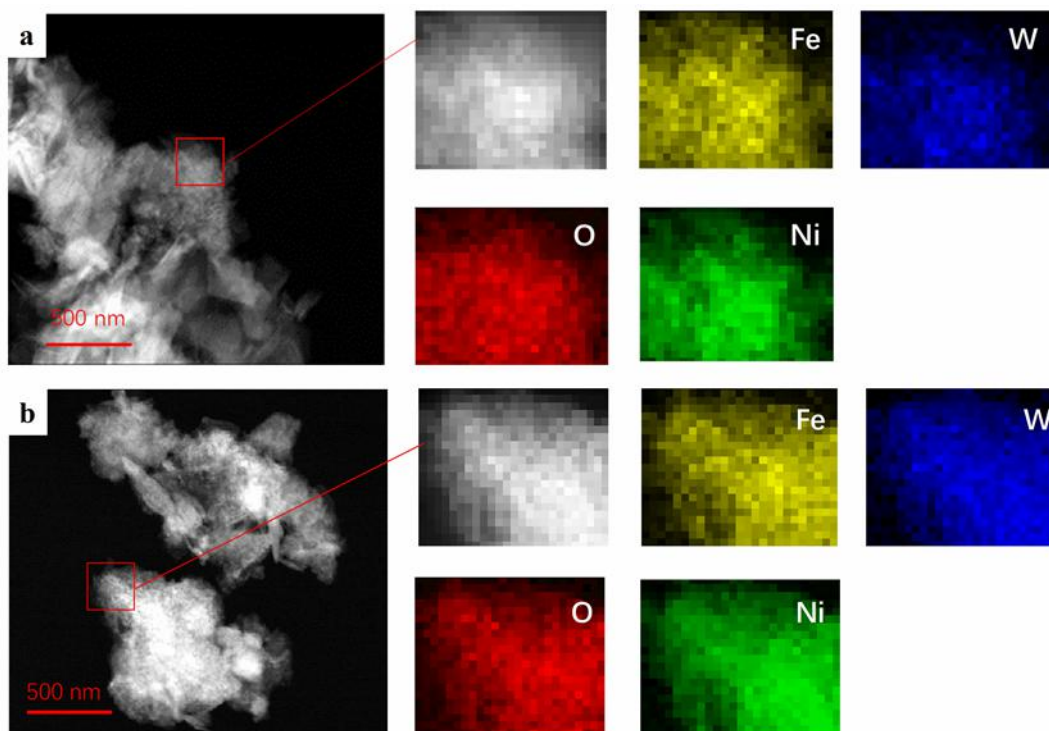

Fig. S6 Scanning transmission electron microscopy (STEM) images and the corresponding elemental mapping of Ni, Fe, W, and O. a)  $\text{Fe}_{0.03}\text{W}_{0.03}\text{-Ni}$  LDH; b) post-OER  $\text{Fe}_{0.03}\text{W}_{0.03}\text{-Ni}$  LDH<sup>B</sup>.

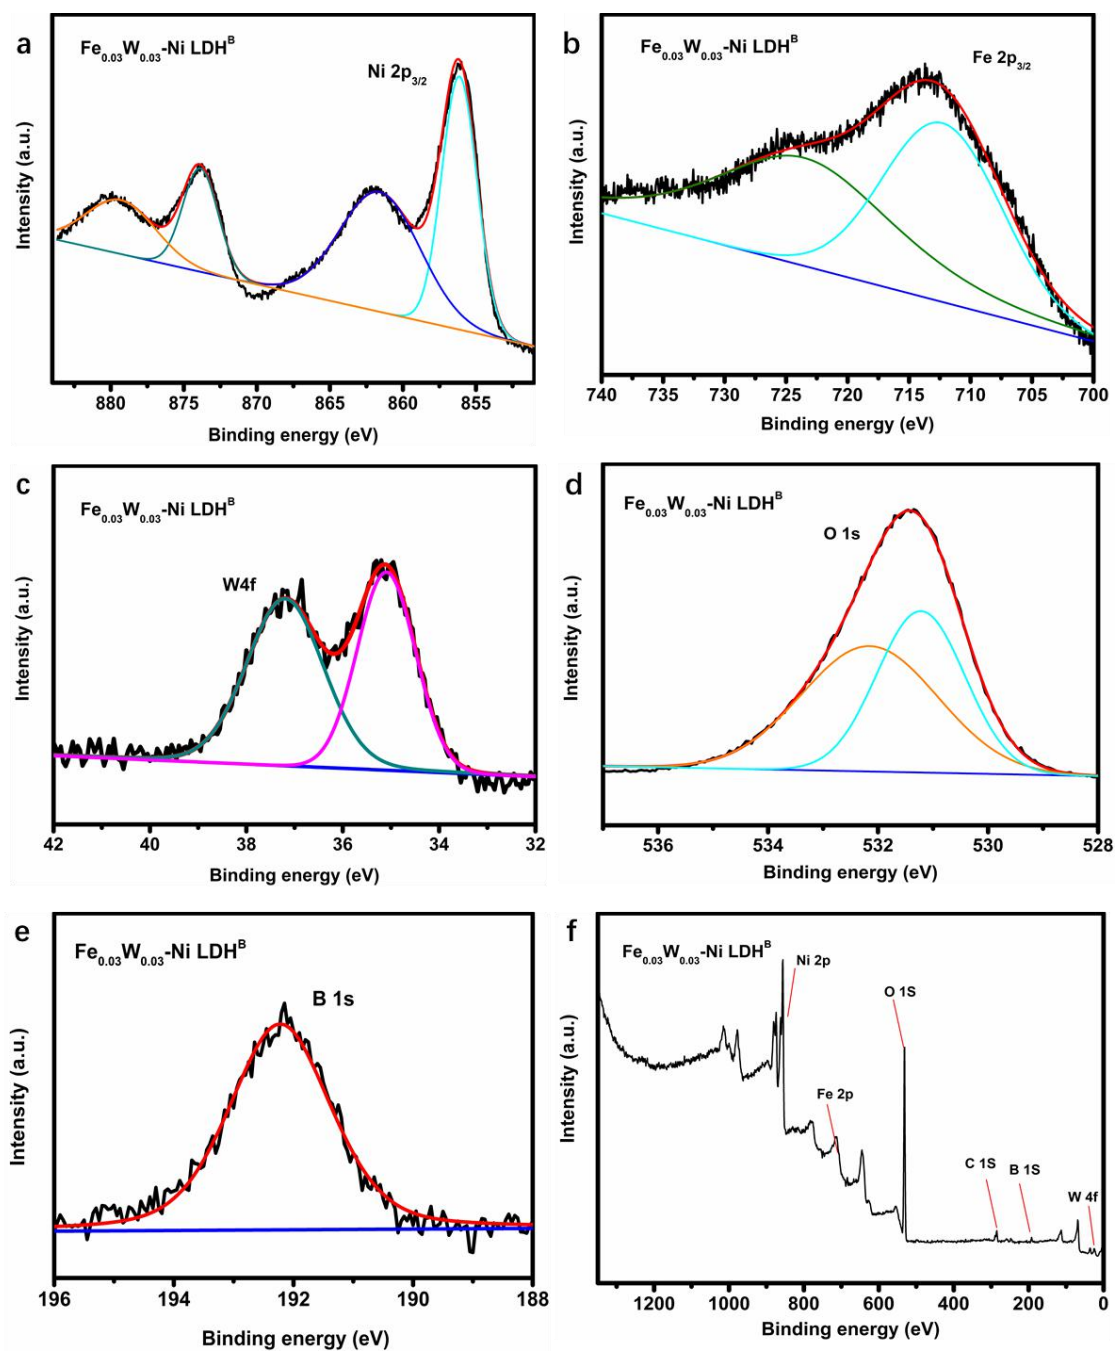

Fig. S7 a-e) XPS fine structures spectrum for  $\text{Fe}_{0.03}\text{W}_{0.03}\text{-Ni LDH}^{\text{B}}$  in Ni 2p, Fe 2p, W 4f, O 1s and B 1s regions. f) XPS survey spectra of  $\text{Fe}_{0.03}\text{W}_{0.03}\text{-Ni LDH}^{\text{B}}$ .

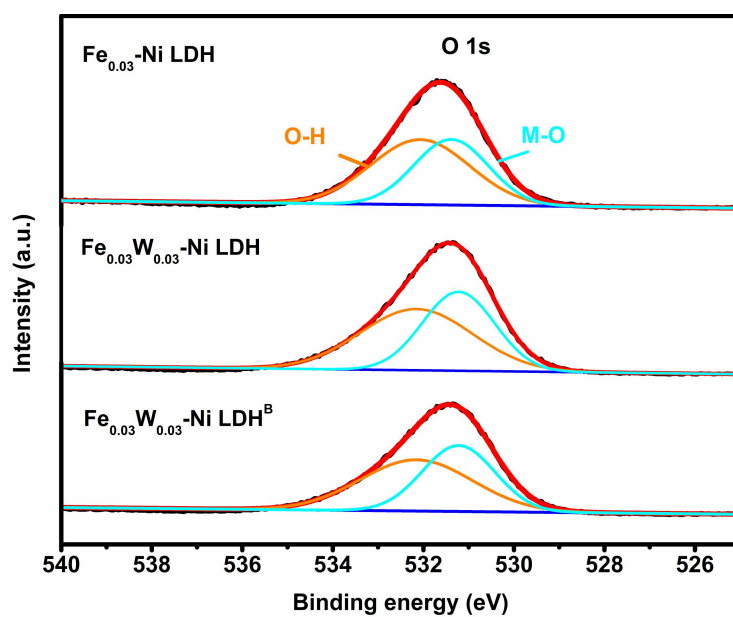

Fig. S8 XPS spectrum for Fe<sub>0.03</sub>-Ni LDH, Fe<sub>0.03</sub>W<sub>0.03</sub>-Ni LDH and Fe<sub>0.03</sub>W<sub>0.03</sub>-Ni LDH<sup>B</sup> in O1s regions.



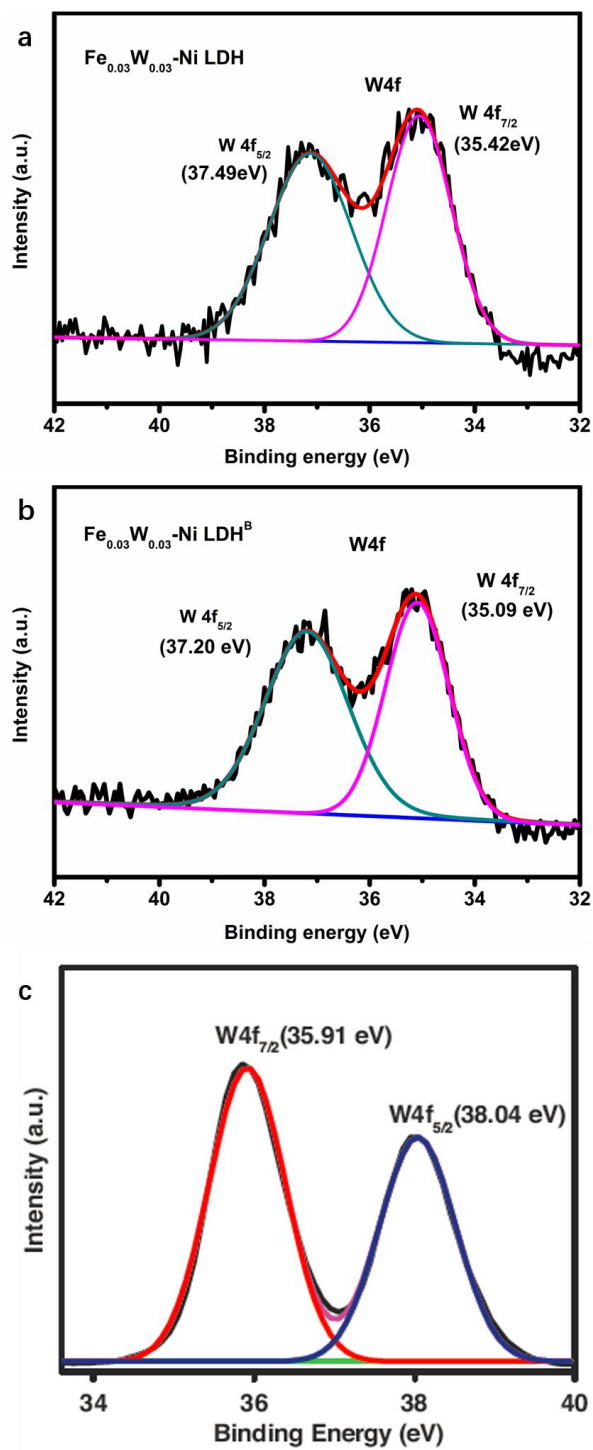

Fig. S9 XPS spectrum for a)  $\text{Fe}_{0.03}\text{W}_{0.03}\text{-Ni LDH}$ , b)  $\text{Fe}_{0.03}\text{W}_{0.03}\text{-Ni LDH}^{\text{B}}$  and c)  $\text{WO}_3$ <sup>[38]</sup> in W4f regions.

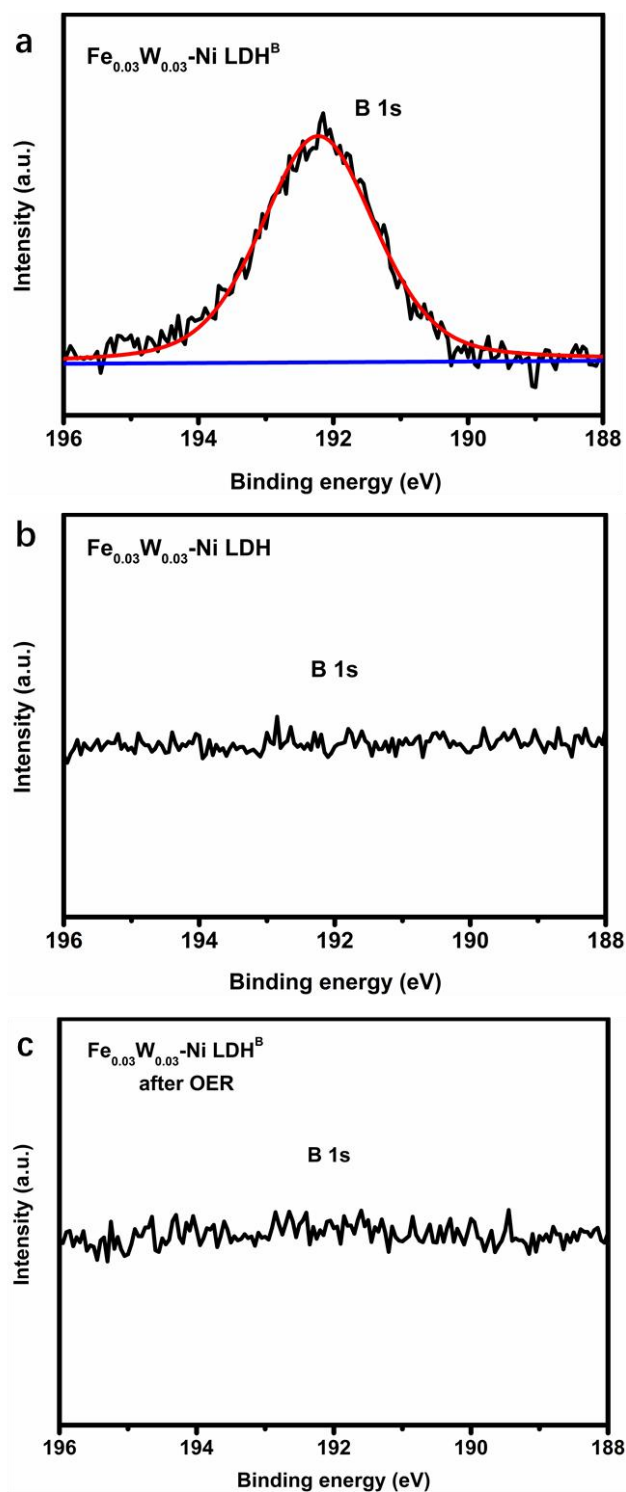

Fig. S10 XPS spectrum for a)  $\text{Fe}_{0.03}\text{W}_{0.03}\text{-Ni LDH}$ , b)  $\text{Fe}_{0.03}\text{W}_{0.03}\text{-Ni LDH}^{\text{B}}$  and c)  $\text{Fe}_{0.03}\text{W}_{0.03}\text{-Ni LDH}^{\text{B}}$  after OER in B1s regions.

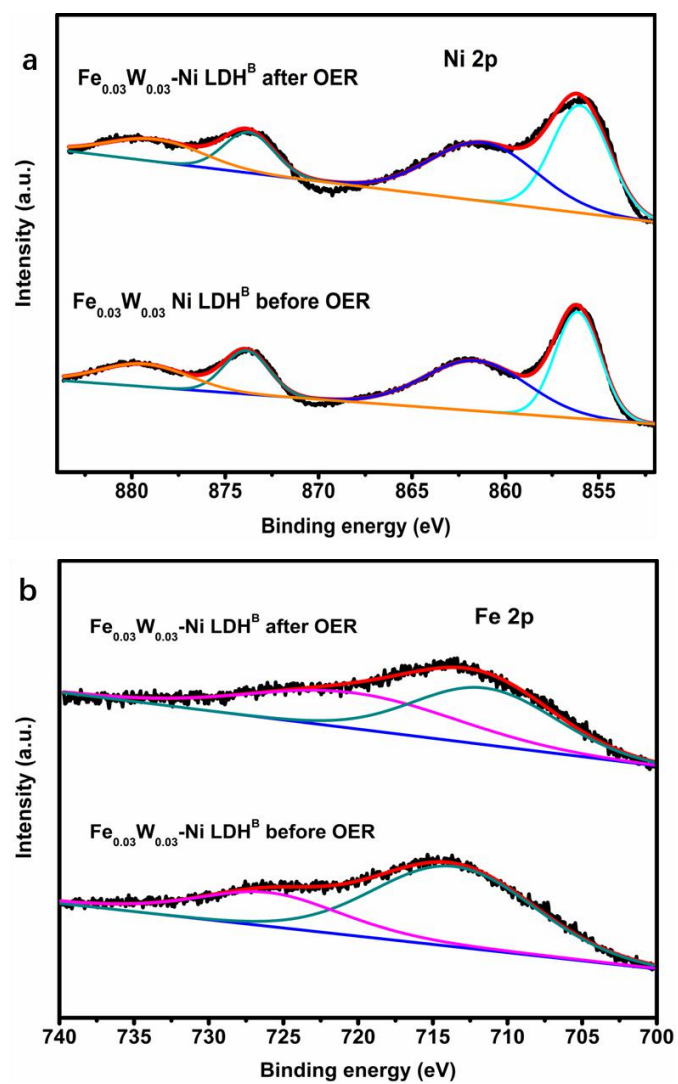

Fig. S11 XPS spectra for  $\text{Fe}_{0.03}\text{W}_{0.03}\text{-Ni LDH}^{\text{B}}$  in a) Ni2p and b) Fe2p regions before and after oxygen evolution reaction.

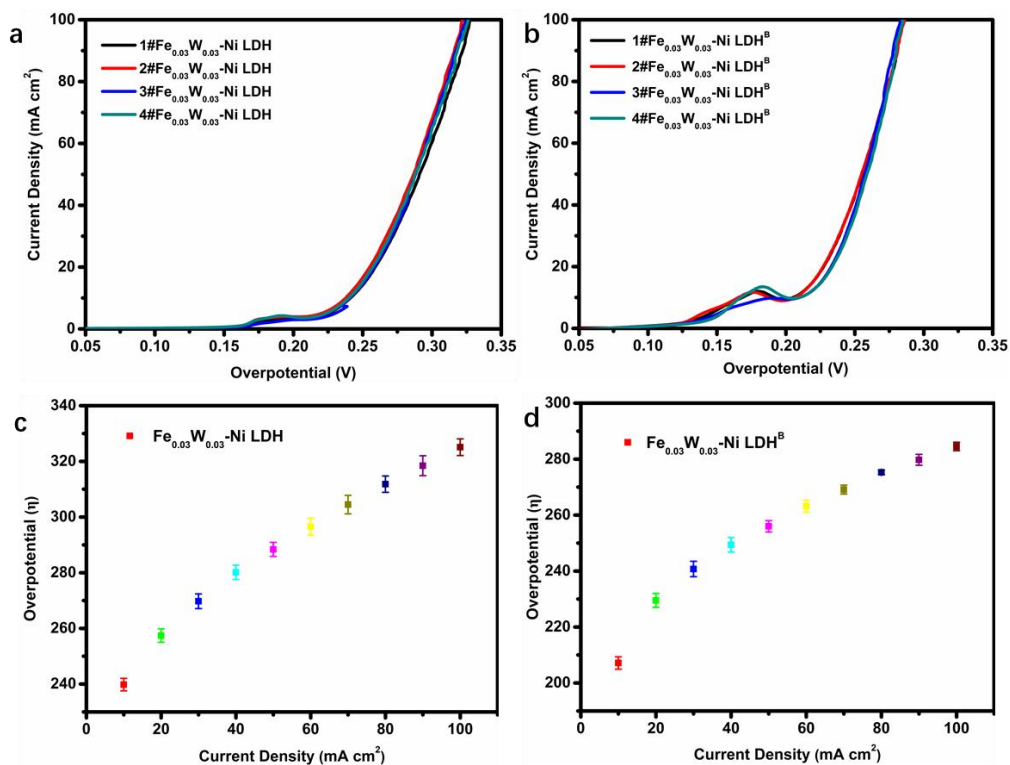

Fig. S12 Four independent OER polarization curves and scale bars of a,c) Fe<sub>0.03</sub>W<sub>0.03</sub>-Ni LDH and b,d) Fe<sub>0.03</sub>W<sub>0.03</sub>-Ni LDH<sup>B</sup> catalysts on carbon clothes.

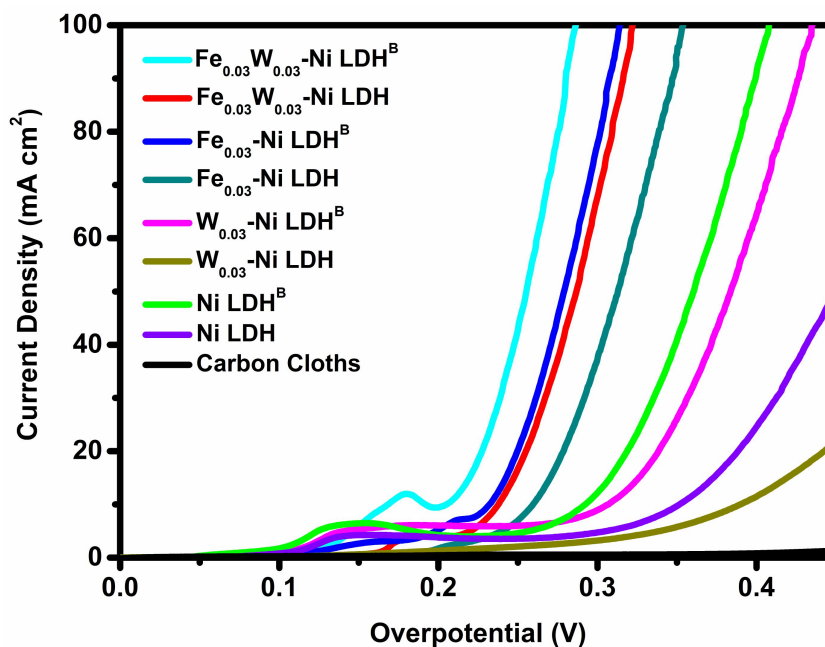

Fig. S13 LSV (Linear scan voltammetry) for more OER catalyst materials.

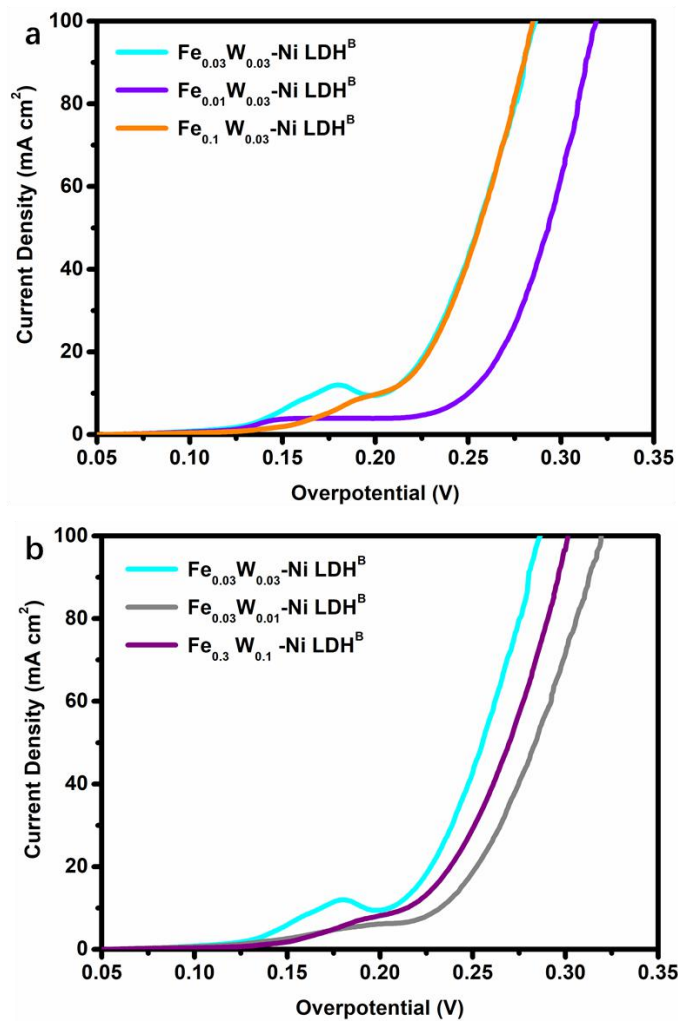

Fig. S14 a,b) LSV curves for different Fe,W atoms ratio of Fe<sub>x</sub>W<sub>y</sub>-Ni LDH<sup>B</sup> OER catalyst materials.

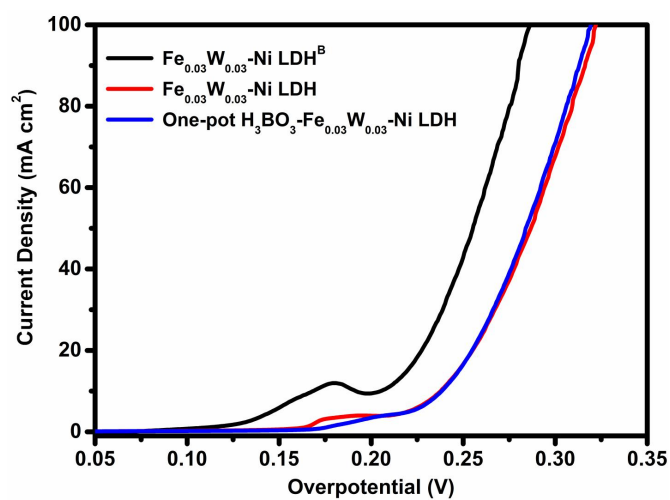

Fig. S15 LSV curves of samples doping with/without B element.

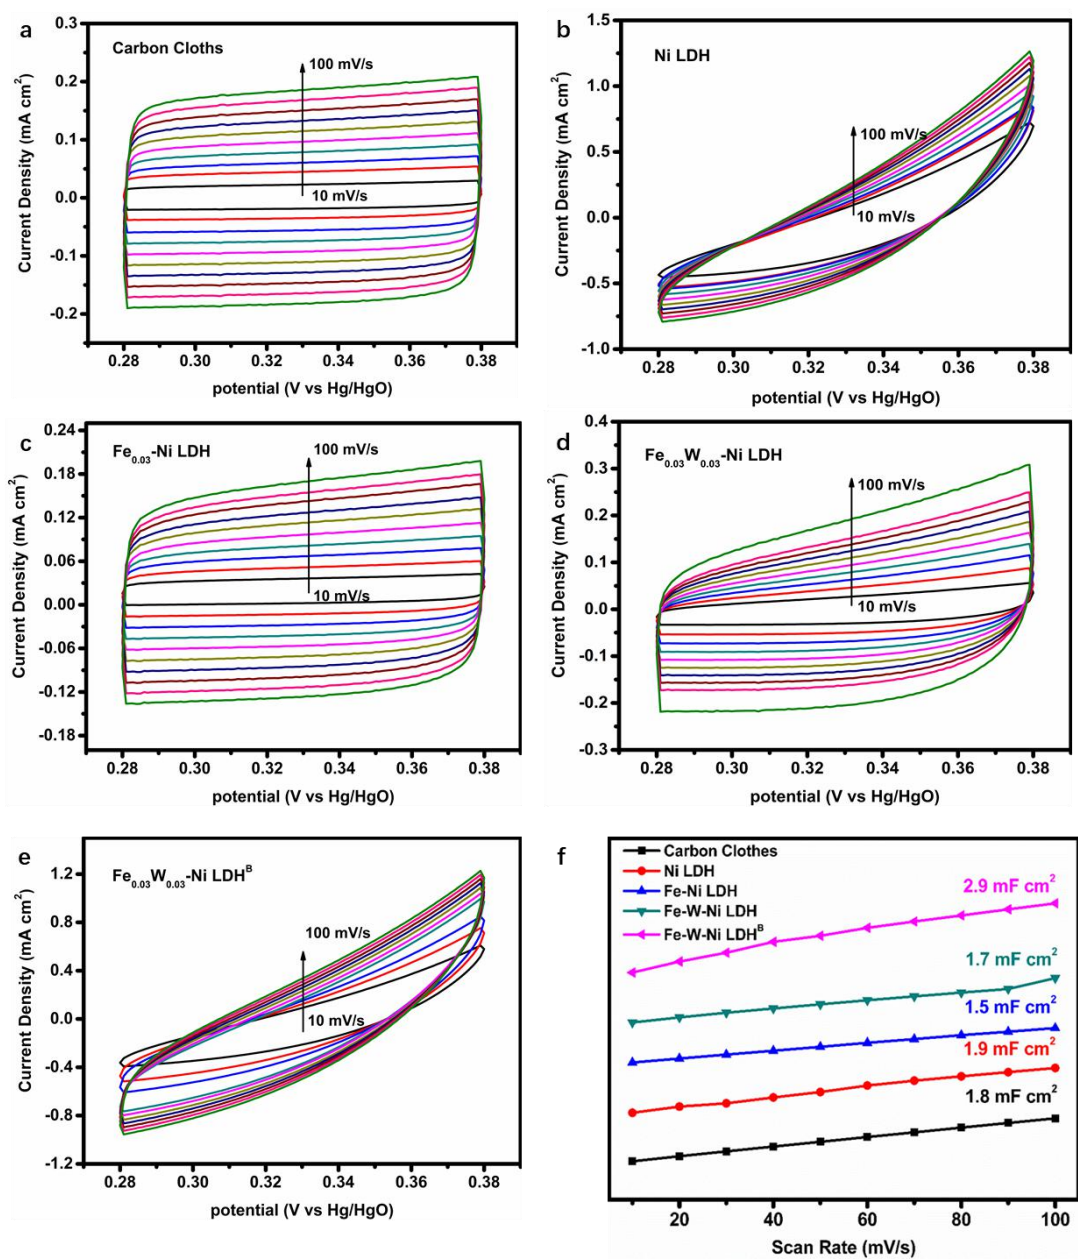

Fig. S16 a-e) Cyclic voltammograms of Carbon Cloths, Ni LDH, Fe<sub>0.03</sub>-Ni LDH, Fe<sub>0.03</sub>W<sub>0.03</sub>-Ni LDH and Fe<sub>0.03</sub>W<sub>0.03</sub>-Ni LDH<sup>B</sup> at scan rates from 10 to 100 mV S<sup>-1</sup>. f) Double layer capacitance values (C<sub>dl</sub>) of Carbon Cloths, Ni LDH, Fe<sub>0.03</sub>-Ni LDH, Fe<sub>0.03</sub>W<sub>0.03</sub>-Ni LDH and Fe<sub>0.03</sub>W<sub>0.03</sub>-Ni LDH<sup>B</sup>.

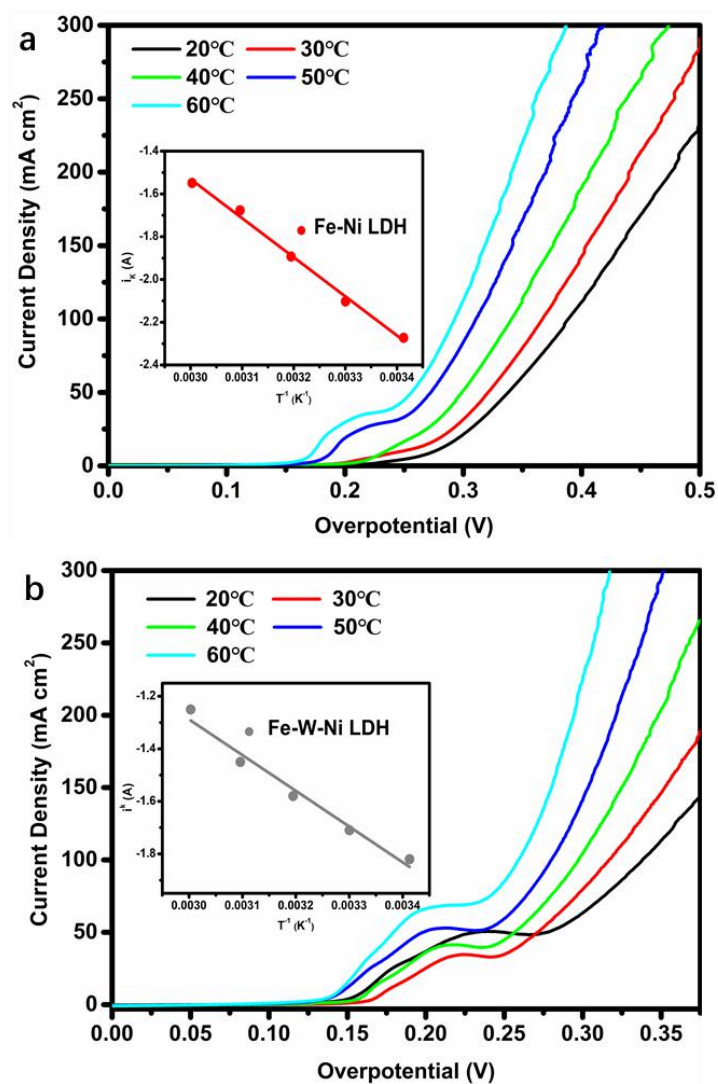

Fig. S17 The OER LSV curve of a)  $\text{Fe}_{0.03}\text{-Ni LDH}$ , b)  $\text{Fe}_{0.03}\text{W}_{0.03}\text{-Ni LDH}$  catalysts in 1 M KOH aqueous electrolyte loaded on carbon clothes with scan rate  $5 \text{ mV s}^{-1}$  at  $20^\circ\text{C}$ ,  $30^\circ\text{C}$ ,  $40^\circ\text{C}$ ,  $50^\circ\text{C}$  and  $60^\circ\text{C}$ , respectively.

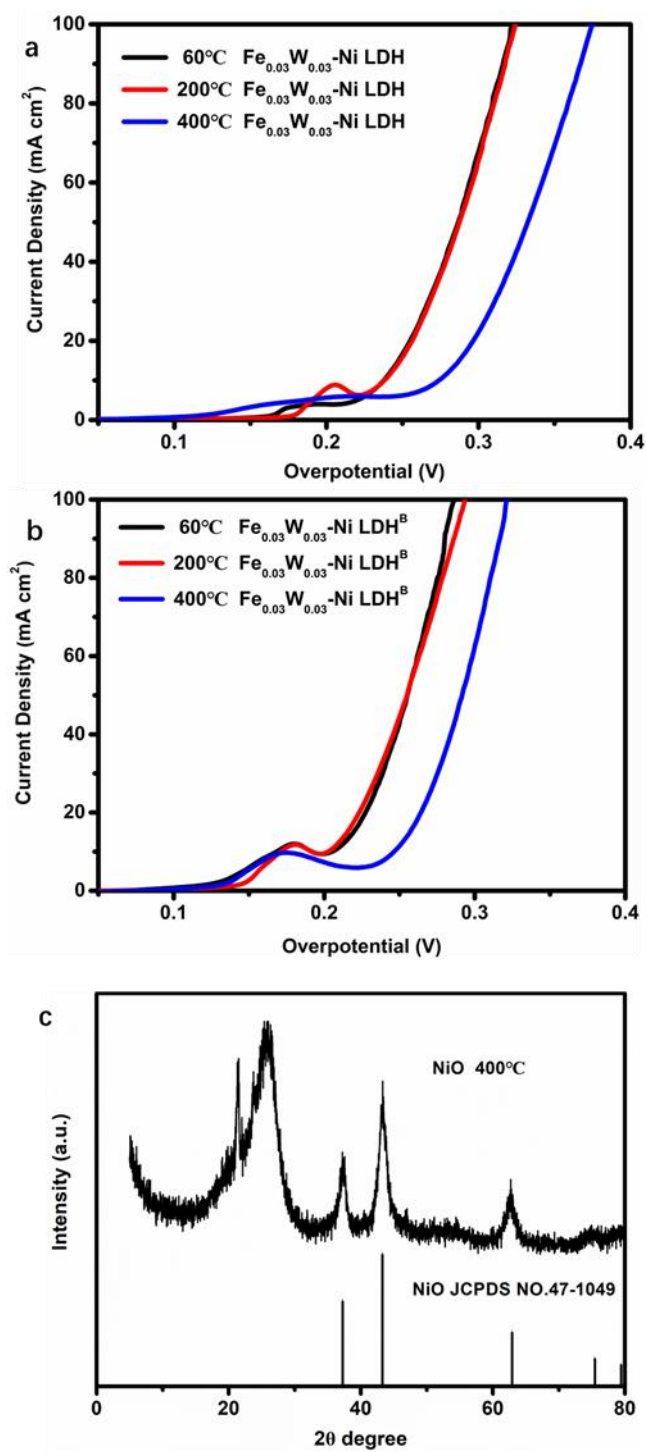

Fig. S18 a,b) LSV curves of Fe<sub>0.03</sub>W<sub>0.03</sub>-Ni LDH and Fe<sub>0.03</sub>W<sub>0.03</sub>-Ni LDH<sup>B</sup> with different annealed temperature. c) XRD pattern of sample after 400°C annealed.



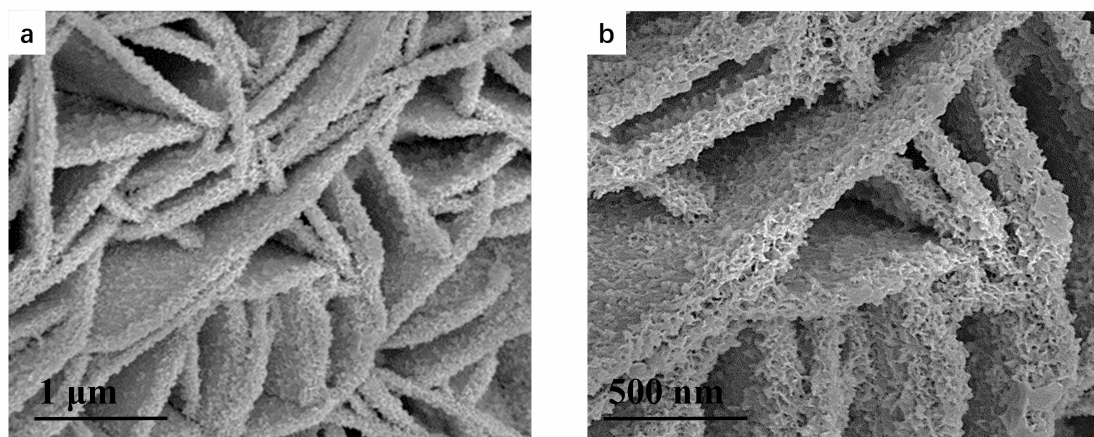

Fig. S19 a,b) SEM images of  $\text{Fe}_{0.03}\text{-W}_{0.03}\text{-Ni LDH}^{\text{B}}$  samples after OER.

Table S1 ICP data of  $\text{Fe}_{0.03}\text{W}_{0.03}\text{-Ni LDH}$ ,  $\text{Fe}_{0.03}\text{W}_{0.03}\text{-Ni LDH}^{\text{B}}$  and  $\text{Fe}_{0.03}\text{W}_{0.03}\text{-Ni LDH}^{\text{B}}$  after OER

| materials                                                                                  | elements | Concentration (mg/L) | molar ratio (%) |
|--------------------------------------------------------------------------------------------|----------|----------------------|-----------------|
| <b><math>\text{Fe}_{0.03}\text{W}_{0.03}\text{-Ni LDH}</math></b>                          | Fe       | 3.572                | 3.97            |
|                                                                                            | W        | 5.792                | 1.96            |
|                                                                                            | Ni       | 88.85                | 94.07           |
| <b><math>\text{Fe}_{0.03}\text{W}_{0.03}\text{-Ni LDH}^{\text{B}}</math></b>               | Fe       | 2.267                | 4.00            |
|                                                                                            | W        | 4.364                | 2.34            |
|                                                                                            | Ni       | 53.86                | 93.66           |
|                                                                                            | B        | 4.769                | --              |
| <b><math>\text{Fe}_{0.03}\text{W}_{0.03}\text{-Ni LDH}^{\text{B}}</math><br/>after OER</b> | Fe       | 4.99                 | 4.62            |
|                                                                                            | W        | 9.19                 | 2.59            |
|                                                                                            | Ni       | 105.3                | 92.79           |
|                                                                                            | B        | 1.362                | --              |

Table S2 Comparison of OER performance in 1.0 M KOH for Fe<sub>0.03</sub>-W<sub>0.03</sub>-Ni LDH<sup>B</sup> with other non-noble-metal electrocatalysts.

| Samples                                                        | $\eta$ (mV) on carbon cloth | $\eta$ (mV) on nickel foam   | $\eta$ (mV) on gold foam | References                                           |
|----------------------------------------------------------------|-----------------------------|------------------------------|--------------------------|------------------------------------------------------|
| <b>Fe<sub>0.03</sub>W<sub>0.03</sub>-Ni LDH<sup>B</sup></b>    | 205                         | 250(50 mA cm <sup>-2</sup> ) | —                        | This work                                            |
| <b>Gel-FeCoW</b>                                               | —                           | —                            | 191                      | <i>Science</i> <b>2016</b> , 352, 333.               |
| <b>CoFeW clusters</b>                                          | 205                         | —                            | 192                      | <i>J. Am. Chem. Soc.</i> <b>2019</b> , 141, 232.     |
| <b>W-doped NiCoP</b>                                           | —                           | 330(50 mA cm <sup>-2</sup> ) | —                        | <i>J Mater Chem A</i> <b>2019</b> , 7, 16859         |
| <b>Ball-milling NiFe NP</b>                                    | 270(glassy carbon)          | —                            | —                        | <i>Angew Chem Int Edit.</i> <b>2019</b> , 58, 736.   |
| <b>Dry exfoliation NiFe NP</b>                                 | 276(glassy carbon)          | —                            | —                        | <i>Angew Chem Int Edit.</i> <b>2017</b> , 56, 5867.  |
| <b>Fe<sub>0.09</sub>Co<sub>0.13</sub>-NiSe<sub>2</sub> LDH</b> | 251                         | —                            | —                        | <i>Adv Mater.</i> <b>2018</b> , 30, 1802121.         |
| <b>NiCoP/NiFe LDH</b>                                          | —                           | 220                          | —                        | <i>Adv. Funct. Mater.</i> <b>2018</b> , 28, 1706847. |
| <b>NaBH<sub>4</sub> soaked Fe-Co<sub>x</sub>O<sub>y</sub></b>  | —                           | 204                          | —                        | <i>Nano Energy</i> <b>2018</b> , 54, 238.            |
